# Supplementary material for: Global scenarios of anthropogenic mercury emissions
Source: Copernicus journal article supplement (doi:10.5194/egusphere-2024-41), 2024-01-17
Supplement: Supplementary file 1 [file 2023-ACP_SI_ScenarioData.xlsx]

## Sheet: 00_BAS_NOC
00_BAS_NOC
YEAR	Region	Subregion	ASGM	CEM	COMB_IND	COMB_OTHER	COMB_POWER	GOLD	IND_PROC	NFME	OTHER	Grand Total
2015	Global		952.611	335.062	141.857	104.631	792.079	103.117	160.752	2334.21	352.078	5276.4
	Africa		280.241	21.0931	3.07125	17.2699	17.0232	20.0006	3.51952	15.1911	14.0407	391.451
	Asia_Pacific		301.028	240.107	124.121	73.2245	541.593	15.1382	86.4037	1535.12	162.865	3079.6
		China	48.2694	161.159	73.4584	50.804	311.654	9.6217	55.8586	1189	100.439	2000.27
		India	6.3687	37.2	37.6339	15.2313	177.015	0	12.917	50.3298	26.5685	363.265
		Japan	0	4.93786	1.32727	0.276961	8.67405	0.4235	6.53087	105.745	9.26978	137.185
		Southeast_Asia	240.912	25.0831	5.30113	3.19214	17.3629	0.602442	4.04883	22.9508	12.8253	332.278
	Central_and_South_America		352.796	10.114	2.79764	1.74751	4.70152	13.1807	9.10105	122.346	13.2186	530.004
		Brazil	50.2677	1.8937	1.77517	0.555401	1.45747	1.64428	5.11054	38.4003	6.56144	107.666
	Eurasia		14.3118	6.6163	2.53002	1.93437	17.9269	24.0742	14.149	120.449	22.2376	224.229
		Russia	7.566	2.4219	1.43629	1.03738	14.8901	13.5936	12.2027	57.5456	20.1515	130.845
	Europe		0	29.6662	4.90085	8.18302	106.491	2.87804	27.1758	425.56	69.4925	674.347
		EU27	0	16.1937	3.07822	5.27744	84.8284	1.4685	20.3964	401.862	55.8042	588.908
	Middle_East		0.234	21.0379	0.776297	0.304453	1.43066	0.4323	7.50088	23.5652	27.664	82.9458
	North_America		3.99938	6.42761	3.6596	1.96744	102.912	27.4133	12.9023	91.9798	42.5591	293.821
		USA	0	4.6365	3.01883	1.24147	99.4851	11.796	8.6274	20.0246	33.0159	181.846
2020	Global		1130.62	351.208	188.576	79.6432	794.054	107.789	152.68	2478.38	266.085	5549.04
	Africa		333.836	23.0802	3.14649	16.0535	15.3417	21.2401	3.06969	14.0457	15.6156	445.429
	Asia_Pacific		369.212	255.826	165.388	50.2448	629.272	14.4781	95.3907	1783.81	128.843	3492.46
		China	44.2064	166.292	87.1758	30.8435	386.713	8.81182	66.908	1450.5	72.6161	2314.07
		India	8.7216	42.16	55.0019	13.6516	178.536	0	11.6324	44.3479	26.8303	380.882
		Japan	0	4.664	2.67325	0.275442	8.7822	0.3476	5.25417	107.452	6.48323	135.932
		Southeast_Asia	310.168	29.3008	8.75771	1.97293	28.5945	0.302868	5.05435	21.6497	12.7585	418.559
	Central_and_South_America		401.99	9.68751	2.955	2.01373	4.48463	12.3163	6.6207	88.71	14.0287	542.807
		Brazil	55.9913	1.653	2.09469	0.934892	1.50935	1.8315	4.07994	29.4747	6.96544	104.535
	Eurasia		22.0042	7.10866	5.05725	1.89509	18.6235	29.2761	10.8705	54.6534	16.8615	166.35
		Russia	9.135	2.184	4.47421	0.716342	14.9158	16.4125	10.3948	54.6534	14.6297	127.516
	Europe		0	28.3974	9.19354	7.32324	65.437	3.71987	19.659	439.307	33.1676	606.205
		EU27	0	15.8879	6.47244	4.64617	43.3973	1.62987	13.199	410.984	26.1459	522.363
	Middle_East		0.2886	20.0636	0.457914	0.230427	1.39701	0.18722	6.36434	20.5384	31.8514	81.3789
	North_America		3.28837	7.0443	2.3781	1.88235	59.4979	26.5712	10.7046	77.321	25.7173	214.405
		USA	0	4.95	2.13882	1.29001	57.616	11.0243	7.11222	19.2784	16.716	120.126
2025	Global		1130.62	367.85	222.81	71.4147	849.283	107.789	160.201	2624.31	277.593	5811.87
	Africa		333.836	26.4326	3.65303	16.858	15.2485	21.2401	3.60062	14.3438	17.8025	453.016
	Asia_Pacific		369.212	266.095	198.538	42.1644	708.266	14.4781	104.141	1887.9	129.061	3719.85
		China	44.2064	166.292	88.9482	23.0215	417.027	8.81182	68.8321	1526.51	67.6067	2411.26
		India	8.7216	49.3241	82.6525	13.6696	225.957	0	16.5254	58.4045	29.1183	484.373
		Japan	0	4.43449	2.78597	0.256325	6.98965	0.3476	6.02014	113.437	6.48127	140.753
		Southeast_Asia	310.168	31.4935	10.4006	1.73261	32.5147	0.302868	5.80524	23.371	14.7854	430.574
	Central_and_South_America		401.99	11.1563	3.51535	2.11773	3.27454	12.3163	6.95765	94.5848	15.464	551.377
		Brazil	55.9913	1.84929	2.39432	0.998569	1.17679	1.8315	4.27017	29.1853	7.89892	105.596
	Eurasia		22.0042	7.35096	4.35966	1.65285	17.7003	29.2761	9.06647	45.1045	18.8389	155.354
		Russia	9.135	2.40208	3.72758	0.63195	12.9528	16.4125	8.43476	45.1045	16.7643	115.565
	Europe		0	28.1441	9.77809	6.3236	59.7821	3.71987	18.8719	479.443	32.9192	638.982
		EU27	0	17.0705	7.26143	4.15555	41.014	1.62987	12.7987	445.514	25.6654	555.11
	Middle_East		0.2886	21.0049	0.529697	0.228744	1.33638	0.18722	6.47399	21.1259	36.7963	87.9717
	North_America		3.28837	7.66571	2.43649	2.06931	43.6744	26.5712	11.0897	81.8141	26.7113	205.32
		USA	0	5.31675	2.15302	1.45649	42.5839	11.0243	7.30319	20.5262	16.8245	107.188
2030	Global		1130.62	395.781	238.981	60.9612	794.975	107.789	161.825	2581.14	287.274	5759.34
	Africa		333.836	32.1845	4.33477	17.1076	13.1322	21.2401	4.25253	16.0734	20.2931	462.455
	Asia_Pacific		369.212	282.223	213.218	32.9999	708.455	14.4781	105.268	1823.84	128.631	3678.32
		China	44.2064	166.292	83.2878	15.96	401.48	8.81182	64.9996	1441.66	61.2938	2287.99
		India	8.7216	60.0552	100.367	11.9957	244.302	0	20.7504	73.1145	31.8638	551.17
		Japan	0	4.58565	2.65616	0.24174	4.96403	0.3476	5.85375	110.557	6.59793	135.804
		Southeast_Asia	310.168	34.3435	11.7411	1.62816	35.4834	0.302868	6.66232	24.7403	17.0402	442.11
	Central_and_South_America		401.99	13.2406	4.02723	2.25587	2.59842	12.3163	7.24367	98.5465	17.0362	559.255
		Brazil	55.9913	2.10282	2.65357	1.14075	1.05107	1.8315	4.33731	28.5631	8.94629	106.618
	Eurasia		22.0042	7.52418	4.61786	1.25308	14.7119	29.2761	8.88151	39.3819	19.0516	146.702
		Russia	9.135	2.55187	3.92059	0.478678	9.82849	16.4125	8.06966	39.3819	17.1293	106.908
	Europe		0	30.3504	9.81755	5.0344	41.1916	3.71987	17.9591	498.564	31.8195	638.457
		EU27	0	18.0028	7.3387	3.48434	22.3139	1.62987	11.3211	460.922	24.4042	549.417
	Middle_East		0.2886	21.8539	0.567022	0.23815	1.3019	0.18722	7.23927	21.6804	42.3962	95.7527
	North_America		3.28837	8.4044	2.39796	2.07225	13.5842	26.5712	10.9811	83.0538	28.0466	178.4
		USA	0	5.68947	2.08782	1.44777	12.9906	11.0243	7.1759	20.8997	17.331	78.6466
2035	Global		1130.62	422.011	255.492	55.1878	706.124	107.789	166.704	2477.18	297.704	5618.81
	Africa		333.836	37.5455	4.94998	17.1364	11.3827	21.2401	5.11469	17.3053	22.6291	471.14
	Asia_Pacific		369.212	298.079	231.11	28.1202	647.751	14.4781	108.296	1717.47	128.039	3542.55
		China	44.2064	166.292	78.2147	13.2349	356.193	8.81182	61.3118	1329.83	54.5854	2112.68
		India	8.7216	70.7894	121.155	10.2234	227.356	0	26.0163	81.6322	34.8097	580.704
		Japan	0	4.73627	2.57455	0.227503	4.28672	0.3476	5.75615	107.437	6.69665	132.062
		Southeast_Asia	310.168	37.055	12.7407	1.54203	39.4695	0.302868	7.86451	25.4784	19.3102	453.931
	Central_and_South_America		401.99	15.1816	4.46357	2.22545	2.15837	12.3163	8.4022	102.225	18.6678	567.631
		Brazil	55.9913	2.34148	2.90198	1.15426	1.05308	1.8315	4.82337	27.4104	10.0244	107.532
	Eurasia		22.0042	7.68922	4.85752	1.03902	13.9341	29.2761	8.85203	34.1769	19.2812	141.11
		Russia	9.135	2.69614	4.10826	0.378415	9.15617	16.4125	7.8702	34.1769	17.5065	101.44
	Europe		0	31.72	7.21829	4.32651	26.286	3.71987	17.2448	501.411	30.9712	622.898
		EU27	0	18.1791	5.01726	3.09	6.76781	1.62987	10.1257	461.027	23.3184	529.155
	Middle_East		0.2886	22.6901	0.574438	0.247259	1.36024	0.18722	7.65068	21.3886	48.3289	102.716
	North_America		3.28837	9.10536	2.31869	2.09297	3.25099	26.5712	11.1436	83.2083	29.7871	170.767
		USA	0	6.04676	1.98769	1.45855	2.7747	11.0243	7.07658	21.5838	18.2549	70.2073
2040	Global		1130.62	442.536	270.584	50.4278	623.533	107.789	174.135	2374.74	306.367	5480.74
	Africa		333.836	42.2724	5.55594	17.3151	8.90955	21.2401	6.02338	17.2719	25.1682	477.593
	Asia_Pacific		369.212	309.903	246.442	23.7198	572.737	14.4781	112.017	1604.84	135.228	3388.58
		China	44.2064	166.292	73.6325	11.2788	314.026	8.81182	58.3875	1217.23	55.8111	1949.67
		India	8.7216	78.7241	139.36	7.99325	194.23	0	31.3534	86.073	37.8067	584.263
		Japan	0	4.7998	2.49035	0.213463	3.86108	0.3476	5.6658	99.8986	6.69194	123.969
		Southeast_Asia	310.168	38.991	13.5044	1.3985	41.5354	0.302868	8.91972	24.7238	21.4754	461.019
	Central_and_South_America		401.99	16.8954	4.88207	2.21737	1.93763	12.3163	9.50576	105.254	20.487	575.486
		Brazil	55.9913	2.52426	3.13014	1.21371	0.97417	1.8315	5.31336	26.3942	11.0569	108.429
	Eurasia		22.0042	7.61783	4.93216	0.952634	13.0191	29.2761	9.24198	30.5427	19.5967	137.183
		Russia	9.135	2.78627	4.14481	0.34008	8.30664	16.4125	8.10487	30.5427	17.7263	97.4992
	Europe		0	33.1397	5.90992	3.81693	23.5169	3.71987	17.3866	513.806	20.0898	621.385
		EU27	0	18.7305	3.80368	2.89735	2.9289	1.62987	9.68064	469.802	12.168	521.641
	Middle_East		0.2886	23.1	0.591487	0.242417	1.52721	0.18722	8.20107	20.843	54.1236	109.105
	North_America		3.28837	9.60681	2.27007	2.16356	1.88598	26.5712	11.7594	82.1854	31.673	171.404
		USA	0	6.28001	1.92101	1.49829	1.46686	11.0243	7.44399	21.3095	19.3022	70.2461
2045	Global		1130.62	455.394	280.618	47.1183	560.376	107.789	183.022	2531.11	324.457	5620.5
	Africa		333.836	45.4068	6.13543	17.7092	7.6751	21.2401	6.72815	21.1566	27.6125	487.5
	Asia_Pacific		369.212	317.288	256.091	20.7571	511.78	14.4781	117.496	1708.72	142.422	3458.24
		China	44.2064	166.292	69.2004	10.5875	278.036	8.81182	56.9337	1277.06	56.9437	1968.07
		India	8.7216	83.6761	152.458	5.87267	170.636	0	36.7443	105.191	40.883	604.182
		Japan	0	4.7667	2.4052	0.206851	2.91994	0.3476	5.69063	99.3526	6.60278	122.292
		Southeast_Asia	310.168	39.9875	13.8147	1.27131	42.1033	0.302868	10.0827	31.7161	23.8144	473.261
	Central_and_South_America		401.99	18.0059	5.23217	2.12743	2.00092	12.3163	10.442	121.685	22.4756	596.275
		Brazil	55.9913	2.6414	3.31287	1.2079	1.05495	1.8315	5.67073	30.1848	12.1903	114.086
	Eurasia		22.0042	7.6493	4.95015	0.871484	13.1616	29.2761	9.58683	30.4371	19.9896	137.926
		Russia	9.135	2.81503	4.13761	0.29557	8.20157	16.4125	8.31477	30.4371	18.0231	97.7723
	Europe		0	34.1313	5.36264	3.24498	22.6652	3.71987	17.6735	530.58	20.5759	637.954
		EU27	0	19.2119	3.22597	2.59706	2.22284	1.62987	9.52989	479.897	12.3772	530.692
	Middle_East		0.2886	23.0347	0.587994	0.251584	1.62495	0.18722	8.78001	26.0491	57.7142	118.518
	North_America		3.28837	9.87776	2.25855	2.15657	1.46819	26.5712	12.3158	92.4858	33.6666	184.089
		USA	0	6.37197	1.89213	1.49302	1.18639	11.0243	7.75224	23.6601	20.3826	73.7628
2050	Global		1130.62	463.976	284.285	44.3973	500.017	107.789	190.408	2599.34	343.691	5664.52
	Africa		333.836	47.531	6.73045	18.1426	6.77522	21.2401	7.35638	25.4488	29.9778	497.039
	Asia_Pacific		369.212	322.64	259.175	18.1362	451.634	14.4781	121.789	1731.81	149.839	3438.71
		China	44.2064	166.292	65.1139	10.2197	242.008	8.81182	55.6245	1263.85	58.125	1914.25
		India	8.7216	87.665	158.913	3.74134	149.485	0	40.8859	118.883	44.0081	612.303
		Japan	0	4.67034	2.31973	0.200126	1.87787	0.3476	5.71888	99.1675	6.44554	120.748
		Southeast_Asia	310.168	40.2985	14.0229	1.19305	40.3981	0.302868	11.1927	37.6994	26.2283	481.504
	Central_and_South_America		401.99	18.7323	5.55091	1.97252	2.17733	12.3163	11.3197	135.848	24.6268	614.535
		Brazil	55.9913	2.70749	3.48508	1.15552	1.15536	1.8315	5.99674	33.2565	13.4471	119.027
	Eurasia		22.0042	7.63466	4.93435	0.804856	13.5344	29.2761	9.84446	29.6387	20.4416	138.113
		Russia	9.135	2.80071	4.10718	0.259671	8.29298	16.4125	8.4581	29.6387	18.3706	97.4754
	Europe		0	34.8077	5.11641	2.93446	22.7968	3.71987	17.9272	545.233	21.147	653.682
		EU27	0	19.7288	2.94355	2.549	1.88028	1.62987	9.40151	487.772	12.6707	538.575
	Middle_East		0.2886	22.6525	0.582439	0.256979	1.7479	0.18722	9.30023	28.85	62.1143	125.98
	North_America		3.28837	9.97746	2.1963	2.14975	1.35129	26.5712	12.8711	102.51	35.5444	196.46
		USA	0	6.36322	1.81305	1.48674	1.14406	11.0243	8.0886	26.3102	21.3129	77.543

## Sheet: 01_BAS-CLE
01_BAS_CLE
YEAR	Region	Subregion	ASGM	CEM	COMB_IND	COMB_OTHER	COMB_POWER	GOLD	IND_PROC	NFME	OTHER	Grand Total
2015	Global		952.611	153.747	85.3612	99.2733	263.518	43.5997	110.115	349.694	263.707	2321.63
	Africa		280.241	11.1812	1.93928	15.8621	8.9797	11.8008	2.88979	12.1153	13.9994	359.009
	Asia_Pacific		301.028	104.902	73.6357	69.9167	179.864	3.46155	53.4297	163.405	142.784	1092.43
		China	48.2694	61.8111	47.0406	47.9756	68.4913	0.693147	33.0987	85.6559	93.4905	486.526
		India	6.3687	21.9108	18.8193	14.8836	92.0443	0	9.82438	8.12	25.4571	197.428
		Japan	0	1.89372	0.691556	0.222872	2.04279	0.0305089	3.19277	7.61787	4.63402	20.3261
		Southeast_Asia	240.912	12.0788	2.99329	3.15612	6.37852	0.438159	3.01011	13.9961	11.1723	294.135
	Central_and_South_America		352.796	5.46003	2.25286	1.83634	2.35501	7.32063	7.31328	18.6041	12.9896	410.928
		Brazil	50.2677	0.807298	1.4614	0.648886	0.73635	0.268159	3.92149	6.19535	6.42066	70.7273
	Eurasia		14.3118	3.897	1.41784	1.84162	10.0892	14.5958	11.8961	55.5107	17.1731	130.733
		Russia	7.566	1.4265	0.852575	0.955998	8.67791	8.55404	10.0892	35.8089	15.1936	89.1247
	Europe		0	13.1392	2.46227	7.67487	35.334	1.31175	19.8931	81.896	20.1816	181.893
		EU27	0	6.97238	1.54284	4.8757	26.4302	0.420575	15.1708	78.2062	11.4019	145.021
	Middle_East		0.234	12.3913	0.690696	0.304081	1.43066	0.285019	6.27752	4.07426	27.4971	53.1847
	North_America		3.99938	2.77561	2.96251	1.83762	25.4652	4.82417	8.41532	14.0892	29.0816	93.4507
		USA	0	1.77814	2.40565	1.12714	24.2455	0.849785	5.52136	1.44257	20.084	57.4541
2020	Global		1130.62	160.894	105.619	73.5472	246.874	33.673	96.1664	295.895	232.056	2375.34
	Africa		333.836	12.1585	1.77782	14.7142	5.90589	8.59661	2.34825	6.53493	15.5718	401.444
	Asia_Pacific		369.212	112.441	91.9429	44.423	194.702	3.51991	56.2013	178.192	120.908	1171.54
		China	44.2064	63.7782	56.4131	25.6085	78.7477	0.634803	39.1575	104.494	70.1925	483.233
		India	8.7216	24.8322	22.7846	13.1456	92.2306	0	7.16755	7.15492	26.6091	202.646
		Japan	0	1.78869	1.31071	0.255226	1.9742	0.0250411	2.60699	7.74087	4.29565	19.9974
		Southeast_Asia	310.168	13.6565	4.3749	1.95702	10.0044	0.294627	3.48784	12.8652	11.8582	368.667
	Central_and_South_America		401.99	5.22464	2.32565	2.20691	1.90084	6.56619	4.82913	13.0226	13.8165	451.883
		Brazil	55.9913	0.688788	1.6853	1.13351	0.650036	0.298692	2.82202	4.75533	6.84483	74.8697
	Eurasia		22.0042	4.187	2.4028	1.87031	10.3536	7.94742	8.52672	6.3774	14.8449	78.5143
		Russia	9.135	1.28638	2.10448	0.71261	8.63176	1.40687	8.187	6.3774	12.6226	50.4641
	Europe		0	11.9975	4.36428	6.902	19.0873	1.83909	13.0023	75.5228	13.6366	146.352
		EU27	0	6.67372	3.03903	4.32715	12.2248	0.523911	8.64568	71.5111	7.93613	114.881
	Middle_East		0.2886	11.8175	0.450374	0.2297	1.37629	0.030533	4.79819	3.42573	31.6716	54.0885
	North_America		3.28837	3.06761	2.35477	3.20098	13.5476	5.17321	6.46052	12.8194	21.6059	71.5184
		USA	0	1.89837	1.99983	2.57505	12.8335	0.794191	4.23146	1.38882	12.9026	38.6238
2025	Global		1130.62	170.389	114.698	65.3238	224.331	29.0236	97.0697	310.523	242.947	2384.93
	Africa		333.836	14.0186	1.98274	15.407	5.15031	4.35673	2.54491	3.2672	17.7321	398.296
	Asia_Pacific		369.212	118.481	100.26	35.7917	179.509	3.51991	60.8249	187.919	120.736	1176.25
		China	44.2064	63.777	52.2161	17.2702	84.2413	0.634803	39.7898	109.97	65.054	477.16
		India	8.7216	29.0519	33.3126	13.1316	70.6836	0	10.3052	9.42275	28.8239	203.453
		Japan	0	1.70067	1.36721	0.239156	1.66272	0.0250411	2.96099	8.17203	4.4864	20.6142
		Southeast_Asia	310.168	14.6417	5.12743	1.71787	10.8804	0.294627	3.9094	13.5491	13.6526	373.941
	Central_and_South_America		401.99	6.00496	2.66865	2.44012	1.45618	6.38117	4.50568	13.9351	15.195	454.577
		Brazil	55.9913	0.757803	1.8847	1.32789	0.51988	0.298692	2.66804	4.70865	7.76093	75.9178
	Eurasia		22.0042	4.32971	2.1294	1.63497	9.97005	7.72291	6.87537	3.24933	16.0224	73.9383
		Russia	9.135	1.41482	1.81042	0.6336	7.48807	1.18236	6.41965	3.24933	13.9638	45.297
	Europe		0	11.8285	4.63303	5.88402	17.4553	1.83909	11.5794	84.4683	13.7201	151.408
		EU27	0	7.02658	3.43411	3.81327	11.6675	0.523911	7.64239	80.809	7.80881	122.726
	Middle_East		0.2886	12.3719	0.514568	0.227757	1.3029	0.030533	4.4408	3.4372	36.5673	59.1816
	North_America		3.28837	3.35413	2.50993	3.93824	9.48688	5.17321	6.29857	14.2462	22.9744	71.2699
		USA	0	2.03903	2.05191	3.21253	9.10159	0.794191	4.10399	1.4787	13.4333	36.2152
2030	Global		1130.62	185.514	115.168	55.9738	184.785	25.9947	96.239	310.029	253.558	2357.88
	Africa		333.836	17.1887	2.40174	15.688	4.02201	1.53014	2.76972	1.15793	20.183	398.778
	Asia_Pacific		369.212	127.509	99.9068	27.3684	154.942	3.51991	61.2407	186.974	120.04	1150.71
		China	44.2064	63.7758	43.8907	10.8813	81.231	0.634803	37.1601	103.857	58.953	444.59
		India	8.7216	35.3725	39.8786	11.5174	49.682	0	13.0413	11.796	31.4567	201.466
		Japan	0	1.75864	1.30778	0.224496	1.20212	0.0250411	2.90081	7.96455	4.63427	20.0177
		Southeast_Asia	310.168	15.8329	5.70269	1.61377	11.857	0.294627	4.36262	14.0929	15.5968	379.521
	Central_and_South_America		401.99	7.11759	2.9466	2.73757	1.20988	6.196	4.2021	14.4672	16.7257	457.593
		Brazil	55.9913	0.84706	2.04952	1.63356	0.486169	0.298692	2.47901	4.60826	8.79869	77.1922
	Eurasia		22.0042	4.43174	2.27378	1.24335	8.29446	7.72291	6.60214	2.83708	16.5223	71.932
		Russia	9.135	1.50305	1.92406	0.484429	5.68731	1.18236	6.01249	2.83708	14.6278	43.3936
	Europe		0	12.688	4.58282	4.58253	12.0855	1.83909	10.7644	88.1742	13.5585	148.275
		EU27	0	7.35218	3.36933	3.11189	6.44812	0.523911	6.46438	84.1306	7.47628	118.877
	Middle_East		0.2886	12.8719	0.545735	0.236846	1.22509	0.0134873	4.66073	1.56186	42.1262	63.5305
	North_America		3.28837	3.70705	2.51072	4.11717	3.00601	5.17321	5.99917	14.8569	24.4023	67.0609
		USA	0	2.18197	2.02353	3.3083	2.80013	0.794191	3.9217	1.50562	14.0571	30.5925
2035	Global		1130.62	200.087	121.237	51.4233	166.025	25.9929	99.0016	303.404	264.642	2362.43
	Africa		333.836	20.2112	2.82267	15.7523	3.46291	1.53014	3.32874	1.24667	22.4925	404.684
	Asia_Pacific		369.212	136.509	106.122	23.3947	143.859	3.51991	63.4518	180.11	119.23	1145.41
		China	44.2064	63.7758	41.2261	8.94283	72.2965	0.634803	34.9512	95.8013	52.4857	414.321
		India	8.7216	41.6949	47.7222	9.85467	46.1951	0	16.5197	13.1702	34.2884	218.167
		Japan	0	1.81641	1.26843	0.210672	1.05094	0.0250411	2.86613	7.73974	4.72194	19.6993
		Southeast_Asia	310.168	17.0581	6.18541	1.52894	13.1265	0.294627	5.11971	14.4779	17.6264	385.585
	Central_and_South_America		401.99	8.17352	3.15477	2.78584	1.0633	6.19412	4.88907	14.9838	18.3284	461.563
		Brazil	55.9913	0.943195	2.19188	1.72675	0.500262	0.298692	2.76502	4.42228	9.86502	78.7043
	Eurasia		22.0042	4.52895	2.40593	1.03565	7.83308	7.72291	6.43365	2.46211	17.014	71.4405
		Russia	9.135	1.58803	2.03152	0.386679	5.29999	1.18236	5.71759	2.46211	15.2776	43.0809
	Europe		0	13.2588	3.74702	3.93214	7.72896	1.83909	10.2115	88.2191	13.4752	142.412
		EU27	0	7.42248	2.59908	2.76401	1.97546	0.523911	5.56712	83.9285	7.20166	111.982
	Middle_East		0.2886	13.3645	0.551689	0.245887	1.22932	0.0134873	4.69532	1.54084	48.0169	69.9465
	North_America		3.28837	4.04119	2.43298	4.27681	0.849151	5.17321	5.99159	14.842	26.0845	66.9797
		USA	0	2.31899	1.94234	3.44122	0.662123	0.794191	3.75943	1.5549	14.9253	29.3985
2040	Global		1130.62	211.201	126.779	47.6745	150.06	25.8445	104.252	295.812	283.077	2375.32
	Africa		333.836	22.5242	3.24729	15.9616	2.93954	1.53014	3.91703	1.24427	25.0014	410.202
	Asia_Pacific		369.212	143.126	111.548	19.8625	129.999	3.51991	66.1551	173.519	126.278	1143.22
		China	44.2064	63.7758	38.8364	7.69252	63.9877	0.634803	33.2388	87.689	53.9342	393.996
		India	8.7216	46.3685	54.5736	7.7688	39.5593	0	20.0673	13.8867	37.207	228.153
		Japan	0	1.84077	1.22635	0.197202	0.95801	0.0250411	2.83221	7.1967	4.71723	18.9935
		Southeast_Asia	310.168	17.7559	6.56673	1.38722	13.8043	0.294627	5.81125	14.182	19.6013	389.571
	Central_and_South_America		401.99	9.31576	3.35444	2.88092	0.973444	6.04575	5.5447	12.2914	20.1346	462.531
		Brazil	55.9913	1.01682	2.32249	1.87237	0.481906	0.298692	3.05444	4.25833	10.8942	80.1905
	Eurasia		22.0042	4.4869	2.44974	0.955906	7.25115	7.72291	6.71622	2.2003	17.5668	71.3541
		Russia	9.135	1.64111	2.05697	0.351512	4.80748	1.18236	5.88458	2.2003	15.7419	43.0013
	Europe		0	13.8573	3.25479	3.45155	7.0053	1.83909	10.4915	90.4563	12.3601	142.716
		EU27	0	7.65888	2.1356	2.58599	0.938933	0.523911	5.39953	85.8206	5.79768	110.861
	Middle_East		0.2886	13.6059	0.565381	0.240986	1.33367	0.0134873	5.04301	1.50153	53.7796	76.3722
	North_America		3.28837	4.28497	2.35935	4.32105	0.557758	5.17321	6.38458	14.5992	27.9571	68.9257
		USA	0	2.40845	1.86761	3.45597	0.381797	0.794191	4.00041	1.53514	15.9581	30.4017
2045	Global		1130.62	218.505	130.37	44.7292	138.829	25.8445	110.324	320.332	301.167	2420.72
	Africa		333.836	24.3145	3.67534	16.3536	2.5959	1.53014	4.38472	1.52412	27.4117	415.627
	Asia_Pacific		369.212	147.496	114.793	17.1959	119.233	3.51991	70.0127	191.494	133.422	1166.38
		China	44.2064	63.7758	36.5803	7.1297	56.9073	0.634803	32.4763	91.9992	55.2561	388.966
		India	8.7216	49.2852	59.5262	5.78479	34.7893	0	23.7059	16.971	40.246	239.03
		Japan	0	1.82808	1.18282	0.190844	0.759659	0.0250411	2.84893	7.15736	4.62512	18.6178
		Southeast_Asia	310.168	18.1979	6.74878	1.26157	14.088	0.294627	6.56051	18.2291	21.7505	397.299
	Central_and_South_America		401.99	9.93721	3.5121	2.80839	1.04324	6.04575	6.10326	14.1783	22.1167	467.735
		Brazil	55.9913	1.06401	2.42064	1.88272	0.543128	0.298692	3.26782	4.86989	12.0311	82.3693
	Eurasia		22.0042	4.50544	2.45881	0.878779	7.34124	7.72291	6.97257	2.19269	18.1701	72.2467
		Russia	9.135	1.65805	2.05364	0.310051	4.74888	1.18236	6.04038	2.19269	16.2545	43.5756
	Europe		0	14.26	3.06253	2.97334	6.78669	1.83909	10.7784	92.897	12.8043	145.401
		EU27	0	7.85239	1.92653	2.36298	0.817907	0.523911	5.35293	87.6162	5.95373	112.407
	Middle_East		0.2886	13.5675	0.56673	0.250061	1.36404	0.0134873	5.41231	1.87658	57.3484	80.6877
	North_America		3.28837	4.42395	2.30212	4.26916	0.464718	5.17321	6.65976	16.1695	29.893	72.6438
		USA	0	2.44371	1.81037	3.38947	0.320299	0.794191	4.13649	1.70448	16.9826	31.5816
2050	Global		1130.62	223.561	131.659	42.271	128.063	25.8445	115.403	337.232	320.188	2454.84
	Africa		333.836	25.5508	4.13911	16.7891	2.29789	1.53014	4.80849	1.83333	29.7419	420.527
	Asia_Pacific		369.212	150.809	115.675	14.8523	108.251	3.51991	73.0623	202.593	140.748	1178.72
		China	44.2064	63.7758	34.5366	6.88017	49.8009	0.634803	31.7748	91.0476	56.5955	379.253
		India	8.7216	51.6347	62.0879	3.80165	30.5761	0	26.5248	19.1801	43.3687	245.896
		Japan	0	1.79112	1.1387	0.184449	0.549921	0.0250411	2.86719	7.14403	4.4651	18.1655
		Southeast_Asia	310.168	18.3269	6.8773	1.1841	13.6144	0.294627	7.2742	21.8327	23.9828	403.555
	Central_and_South_America		401.99	10.3457	3.64577	2.66382	1.19457	6.04575	6.62564	15.7773	24.2714	472.56
		Brazil	55.9913	1.09063	2.50412	1.8387	0.638989	0.298692	3.46149	5.36547	13.2967	84.486
	Eurasia		22.0042	4.49681	2.45165	0.816392	7.55877	7.72291	7.16367	2.13517	18.8064	73.1559
		Russia	9.135	1.64962	2.03902	0.277323	4.80363	1.18236	6.14633	2.13517	16.7924	44.1608
	Europe		0	14.5318	2.97533	2.68811	6.90812	1.83909	11.0317	95.1111	13.1744	148.26
		EU27	0	8.06115	1.81872	2.3233	0.770851	0.523911	5.31322	89.1885	6.04103	114.041
	Middle_East		0.2886	13.3423	0.565411	0.255378	1.41189	0.0134873	5.74344	2.07835	61.7443	85.4432
	North_America		3.28837	4.48415	2.20647	4.20587	0.440445	5.17321	6.96798	17.7039	31.7008	76.1713
		USA	0	2.44036	1.71527	3.3147	0.30668	0.794191	4.32232	1.89538	17.8438	32.6327

## Sheet: 02_BAS_MINA
02_BAS_MINA
YEAR	Region	Subregion	ASGM	CEM	COMB_IND	COMB_OTHER	COMB_POWER	GOLD	IND_PROC	NFME	OTHER	Grand Total
2015	Global		952.611	153.693	85.1953	99.2714	263.213	43.5997	110.091	349.694	263.238	2320.61
	Africa		280.241	11.1812	1.93928	15.8621	8.9797	11.8008	2.88979	12.1153	13.9994	359.009
	Asia_Pacific		301.028	104.849	73.4699	69.9148	179.56	3.46155	53.4059	163.405	142.315	1091.41
		China	48.2694	61.7577	46.8747	47.9737	68.1869	0.693147	33.0748	85.6559	93.0214	485.508
		India	6.3687	21.9108	18.8193	14.8836	92.0443	0	9.82438	8.12	25.4571	197.428
		Japan	0	1.89372	0.691556	0.222872	2.04279	0.0305089	3.19277	7.61787	4.63402	20.3261
		Southeast_Asia	240.912	12.0788	2.99329	3.15612	6.37852	0.438159	3.01011	13.9961	11.1723	294.135
	Central_and_South_America		352.796	5.46003	2.25286	1.83634	2.35501	7.32063	7.31328	18.6041	12.9896	410.928
		Brazil	50.2677	0.807298	1.4614	0.648886	0.73635	0.268159	3.92149	6.19535	6.42066	70.7273
	Eurasia		14.3118	3.897	1.41784	1.84162	10.0892	14.5958	11.8961	55.5107	17.1731	130.733
		Russia	7.566	1.4265	0.852575	0.955998	8.67791	8.55404	10.0892	35.8089	15.1936	89.1247
	Europe		0	13.1392	2.46227	7.67487	35.334	1.31175	19.8931	81.896	20.1816	181.893
		EU27	0	6.97238	1.54284	4.8757	26.4302	0.420575	15.1708	78.2062	11.4019	145.021
	Middle_East		0.234	12.3913	0.690696	0.304081	1.43066	0.285019	6.27752	4.07426	27.4971	53.1847
	North_America		3.99938	2.77561	2.96251	1.83762	25.4652	4.82417	8.41532	14.0892	29.0816	93.4507
		USA	0	1.77814	2.40565	1.12714	24.2455	0.849785	5.52136	1.44257	20.084	57.4541
2020	Global		968.66	160.845	105.487	73.5449	246.539	33.673	96.1434	295.895	231.536	2212.32
	Africa		310.296	12.1585	1.77782	14.7142	5.90589	8.59661	2.34825	6.53493	15.5718	377.904
	Asia_Pacific		233.571	112.392	91.8109	44.4207	194.368	3.51991	56.1783	178.192	120.388	1034.84
		China	44.2064	63.7297	56.2811	25.6062	78.4133	0.634803	39.1345	104.494	69.6727	482.173
		India	8.7216	24.8322	22.7846	13.1456	92.2306	0	7.16755	7.15492	26.6091	202.646
		Japan	0	1.78869	1.31071	0.255226	1.9742	0.0250411	2.60699	7.74087	4.29565	19.9974
		Southeast_Asia	174.526	13.6565	4.3749	1.95702	10.0044	0.294627	3.48784	12.8652	11.8582	233.025
	Central_and_South_America		401.99	5.22464	2.32565	2.20691	1.90084	6.56619	4.82913	13.0226	13.8165	451.883
		Brazil	55.9913	0.688788	1.6853	1.13351	0.650036	0.298692	2.82202	4.75533	6.84483	74.8697
	Eurasia		19.2253	4.187	2.4028	1.87031	10.3536	7.94742	8.52672	6.3774	14.8449	75.7355
		Russia	9.135	1.28638	2.10448	0.71261	8.63176	1.40687	8.187	6.3774	12.6226	50.4641
	Europe		0	11.9975	4.36428	6.902	19.0873	1.83909	13.0023	75.5228	13.6366	146.352
		EU27	0	6.67372	3.03903	4.32715	12.2248	0.523911	8.64568	71.5111	7.93613	114.881
	Middle_East		0.2886	11.8175	0.450374	0.2297	1.37629	0.030533	4.79819	3.42573	31.6716	54.0885
	North_America		3.28837	3.06761	2.35477	3.20098	13.5476	5.17321	6.46052	12.8194	21.6059	71.5184
		USA	0	1.89837	1.99983	2.57505	12.8335	0.794191	4.23146	1.38882	12.9026	38.6238
2025	Global		789.245	170.342	114.575	65.3213	223.96	29.0236	97.0475	310.523	242.328	2042.36
	Africa		277.728	14.0186	1.98274	15.407	5.15031	4.35673	2.54491	3.2672	17.7321	342.188
	Asia_Pacific		96.4004	118.434	100.137	35.7891	179.138	3.51991	60.8027	187.919	120.117	902.257
		China	44.2064	63.7297	52.093	17.2676	83.8702	0.634803	39.7676	109.97	64.4347	475.974
		India	8.7216	29.0519	33.3126	13.1316	70.6836	0	10.3052	9.42275	28.8239	203.453
		Japan	0	1.70067	1.36721	0.239156	1.66272	0.0250411	2.96099	8.17203	4.4864	20.6142
		Southeast_Asia	38.8849	14.6417	5.12743	1.71787	10.8804	0.294627	3.9094	13.5491	13.6526	102.658
	Central_and_South_America		395.093	6.00496	2.66865	2.44012	1.45618	6.38117	4.50568	13.9351	15.195	447.68
		Brazil	55.9913	0.757803	1.8847	1.32789	0.51988	0.298692	2.66804	4.70865	7.76093	75.9178
	Eurasia		16.4465	4.32971	2.1294	1.63497	9.97005	7.72291	6.87537	3.24933	16.0224	68.3807
		Russia	9.135	1.41482	1.81042	0.6336	7.48807	1.18236	6.41965	3.24933	13.9638	45.297
	Europe		0	11.8285	4.63303	5.88402	17.4553	1.83909	11.5794	84.4683	13.7201	151.408
		EU27	0	7.02658	3.43411	3.81327	11.6675	0.523911	7.64239	80.809	7.80881	122.726
	Middle_East		0.2886	12.3719	0.514568	0.227757	1.3029	0.030533	4.4408	3.4372	36.5673	59.1816
	North_America		3.28837	3.35413	2.50993	3.93824	9.48688	5.17321	6.29857	14.2462	22.9744	71.2699
		USA	0	2.03903	2.05191	3.21253	9.10159	0.794191	4.10399	1.4787	13.4333	36.2152
2030	Global		738.84	185.468	115.056	55.9712	184.424	25.9947	96.2193	310.029	252.825	1964.83
	Africa		242.183	17.1887	2.40174	15.688	4.02201	1.53014	2.76972	1.15793	20.183	307.125
	Asia_Pacific		94.2007	127.463	99.7946	27.3657	154.581	3.51991	61.221	186.974	119.306	874.426
		China	44.2064	63.7297	43.7785	10.8786	80.8695	0.634803	37.1404	103.857	58.22	443.315
		India	8.7216	35.3725	39.8786	11.5174	49.682	0	13.0413	11.796	31.4567	201.466
		Japan	0	1.75864	1.30778	0.224496	1.20212	0.0250411	2.90081	7.96455	4.63427	20.0177
		Southeast_Asia	38.2144	15.8329	5.70269	1.61377	11.857	0.294627	4.36262	14.0929	15.5968	107.568
	Central_and_South_America		382.432	7.11759	2.9466	2.73757	1.20988	6.196	4.2021	14.4672	16.7257	438.035
		Brazil	55.9913	0.84706	2.04952	1.63356	0.486169	0.298692	2.47901	4.60826	8.79869	77.1922
	Eurasia		16.4465	4.43174	2.27378	1.24335	8.29446	7.72291	6.60214	2.83708	16.5223	66.3743
		Russia	9.135	1.50305	1.92406	0.484429	5.68731	1.18236	6.01249	2.83708	14.6278	43.3936
	Europe		0	12.688	4.58282	4.58253	12.0855	1.83909	10.7644	88.1742	13.5585	148.275
		EU27	0	7.35218	3.36933	3.11189	6.44812	0.523911	6.46438	84.1306	7.47628	118.877
	Middle_East		0.2886	12.8719	0.545735	0.236846	1.22509	0.0134873	4.66073	1.56186	42.1262	63.5305
	North_America		3.28837	3.70705	2.51072	4.11717	3.00601	5.17321	5.99917	14.8569	24.4023	67.0609
		USA	0	2.18197	2.02353	3.3083	2.80013	0.794191	3.9217	1.50562	14.0571	30.5925
2035	Global		718.38	200.041	121.133	51.4205	165.748	25.9929	98.983	303.404	263.819	1948.92
	Africa		234.014	20.2112	2.82267	15.7523	3.46291	1.53014	3.32874	1.24667	22.4925	304.861
	Asia_Pacific		93.4362	136.463	106.018	23.3919	143.581	3.51991	63.4332	180.11	118.408	868.36
		China	44.2064	63.7297	41.1214	8.94003	72.019	0.634803	34.9326	95.8013	51.6629	413.048
		India	8.7216	41.6949	47.7222	9.85467	46.1951	0	16.5197	13.1702	34.2884	218.167
		Japan	0	1.81641	1.26843	0.210672	1.05094	0.0250411	2.86613	7.73974	4.72194	19.6993
		Southeast_Asia	38.2144	17.0581	6.18541	1.52894	13.1265	0.294627	5.11971	14.4779	17.6264	113.632
	Central_and_South_America		370.906	8.17352	3.15477	2.78584	1.0633	6.19412	4.88907	14.9838	18.3284	430.479
		Brazil	55.9913	0.943195	2.19188	1.72675	0.500262	0.298692	2.76502	4.42228	9.86502	78.7043
	Eurasia		16.4465	4.52895	2.40593	1.03565	7.83308	7.72291	6.43365	2.46211	17.014	65.8828
		Russia	9.135	1.58803	2.03152	0.386679	5.29999	1.18236	5.71759	2.46211	15.2776	43.0809
	Europe		0	13.2588	3.74702	3.93214	7.72896	1.83909	10.2115	88.2191	13.4752	142.412
		EU27	0	7.42248	2.59908	2.76401	1.97546	0.523911	5.56712	83.9285	7.20166	111.982
	Middle_East		0.2886	13.3645	0.551689	0.245887	1.22932	0.0134873	4.69532	1.54084	48.0169	69.9465
	North_America		3.28837	4.04119	2.43298	4.27681	0.849151	5.17321	5.99159	14.842	26.0845	66.9797
		USA	0	2.31899	1.94234	3.44122	0.662123	0.794191	3.75943	1.5549	14.9253	29.3985
2040	Global		709.635	211.155	126.68	47.6715	149.842	25.8445	104.234	295.812	282.179	1953.05
	Africa		226.034	22.5242	3.24729	15.9616	2.93954	1.53014	3.91703	1.24427	25.0014	302.399
	Asia_Pacific		92.6716	143.08	111.449	19.8595	129.781	3.51991	66.137	173.519	125.379	865.397
		China	44.2064	63.7297	38.7378	7.68952	63.7703	0.634803	33.2207	87.689	53.0358	392.714
		India	8.7216	46.3685	54.5736	7.7688	39.5593	0	20.0673	13.8867	37.207	228.153
		Japan	0	1.84077	1.22635	0.197202	0.95801	0.0250411	2.83221	7.1967	4.71723	18.9935
		Southeast_Asia	38.2144	17.7559	6.56673	1.38722	13.8043	0.294627	5.81125	14.182	19.6013	117.618
	Central_and_South_America		370.906	9.31576	3.35444	2.88092	0.973444	6.04575	5.5447	12.2914	20.1346	431.447
		Brazil	55.9913	1.01682	2.32249	1.87237	0.481906	0.298692	3.05444	4.25833	10.8942	80.1905
	Eurasia		16.4465	4.4869	2.44974	0.955906	7.25115	7.72291	6.71622	2.2003	17.5668	65.7964
		Russia	9.135	1.64111	2.05697	0.351512	4.80748	1.18236	5.88458	2.2003	15.7419	43.0013
	Europe		0	13.8573	3.25479	3.45155	7.0053	1.83909	10.4915	90.4563	12.3601	142.716
		EU27	0	7.65888	2.1356	2.58599	0.938933	0.523911	5.39953	85.8206	5.79768	110.861
	Middle_East		0.2886	13.6059	0.565381	0.240986	1.33367	0.0134873	5.04301	1.50153	53.7796	76.3722
	North_America		3.28837	4.28497	2.35935	4.32105	0.557758	5.17321	6.38458	14.5992	27.9571	68.9257
		USA	0	2.40845	1.86761	3.45597	0.381797	0.794191	4.00041	1.53514	15.9581	30.4017
2045	Global		704.639	218.458	130.278	44.7259	138.64	25.8445	110.305	320.332	300.186	1993.41
	Africa		221.803	24.3145	3.67534	16.3536	2.5959	1.53014	4.38472	1.52412	27.4117	303.593
	Asia_Pacific		91.907	147.45	114.7	17.1925	119.045	3.51991	69.9939	191.494	132.442	887.744
		China	44.2064	63.7297	36.4879	7.12638	56.7188	0.634803	32.4575	91.9992	54.2756	387.636
		India	8.7216	49.2852	59.5262	5.78479	34.7893	0	23.7059	16.971	40.246	239.03
		Japan	0	1.82808	1.18282	0.190844	0.759659	0.0250411	2.84893	7.15736	4.62512	18.6178
		Southeast_Asia	38.2144	18.1979	6.74878	1.26157	14.088	0.294627	6.56051	18.2291	21.7505	125.345
	Central_and_South_America		370.906	9.93721	3.5121	2.80839	1.04324	6.04575	6.10326	14.1783	22.1167	436.651
		Brazil	55.9913	1.06401	2.42064	1.88272	0.543128	0.298692	3.26782	4.86989	12.0311	82.3693
	Eurasia		16.4465	4.50544	2.45881	0.878779	7.34124	7.72291	6.97257	2.19269	18.1701	66.689
		Russia	9.135	1.65805	2.05364	0.310051	4.74888	1.18236	6.04038	2.19269	16.2545	43.5756
	Europe		0	14.26	3.06253	2.97334	6.78669	1.83909	10.7784	92.897	12.8043	145.401
		EU27	0	7.85239	1.92653	2.36298	0.817907	0.523911	5.35293	87.6162	5.95373	112.407
	Middle_East		0.2886	13.5675	0.56673	0.250061	1.36404	0.0134873	5.41231	1.87658	57.3484	80.6877
	North_America		3.28837	4.42395	2.30212	4.26916	0.464718	5.17321	6.65976	16.1695	29.893	72.6438
		USA	0	2.44371	1.81037	3.38947	0.320299	0.794191	4.13649	1.70448	16.9826	31.5816
2050	Global		699.626	223.515	131.572	42.267	127.904	25.8445	115.385	337.232	319.119	2022.46
	Africa		217.554	25.5508	4.13911	16.7891	2.29789	1.53014	4.80849	1.83333	29.7419	304.245
	Asia_Pacific		91.1424	150.763	115.588	14.8483	108.092	3.51991	73.0437	202.593	139.68	899.271
		China	44.2064	63.7297	34.4499	6.87619	49.6419	0.634803	31.7562	91.0476	55.5266	377.869
		India	8.7216	51.6347	62.0879	3.80165	30.5761	0	26.5248	19.1801	43.3687	245.896
		Japan	0	1.79112	1.1387	0.184449	0.549921	0.0250411	2.86719	7.14403	4.4651	18.1655
		Southeast_Asia	38.2144	18.3269	6.8773	1.1841	13.6144	0.294627	7.2742	21.8327	23.9828	131.601
	Central_and_South_America		370.906	10.3457	3.64577	2.66382	1.19457	6.04575	6.62564	15.7773	24.2714	441.476
		Brazil	55.9913	1.09063	2.50412	1.8387	0.638989	0.298692	3.46149	5.36547	13.2967	84.486
	Eurasia		16.4465	4.49681	2.45165	0.816392	7.55877	7.72291	7.16367	2.13517	18.8064	67.5983
		Russia	9.135	1.64962	2.03902	0.277323	4.80363	1.18236	6.14633	2.13517	16.7924	44.1608
	Europe		0	14.5318	2.97533	2.68811	6.90812	1.83909	11.0317	95.1111	13.1744	148.26
		EU27	0	8.06115	1.81872	2.3233	0.770851	0.523911	5.31322	89.1885	6.04103	114.041
	Middle_East		0.2886	13.3423	0.565411	0.255378	1.41189	0.0134873	5.74344	2.07835	61.7443	85.4432
	North_America		3.28837	4.48415	2.20647	4.20587	0.440445	5.17321	6.96798	17.7039	31.7008	76.1713
		USA	0	2.44036	1.71527	3.3147	0.30668	0.794191	4.32232	1.89538	17.8438	32.6327

## Sheet: 03_BAS_coMFR
03_BAS_coMFR
YEAR	Region	Subregion	ASGM	CEM	COMB_IND	COMB_OTHER	COMB_POWER	GOLD	IND_PROC	NFME	OTHER	Grand Total
2025	Global		1130.62	161.663	113.315	64.2979	222.697	24.4586	94.406	284.182	199.876	2295.52
	Africa		333.836	13.0482	1.91132	15.1501	4.64648	3.65008	2.42339	2.70873	12.8624	390.237
	Asia_Pacific		369.212	112.893	99.0256	35.251	179.851	3.0764	59.4948	176.591	105.484	1140.88
		China	44.2064	63.7831	52.4088	17.0497	84.2108	0.634803	37.7791	109.97	60.5803	470.623
		India	8.7216	26.518	32.9998	13.0035	74.086	0	11.3823	9.42275	22.4719	198.606
		Japan	0	1.70067	1.3431	0.234215	1.64156	0.0250411	2.91469	8.17203	4.36733	20.3986
		Southeast_Asia	310.168	14.0008	4.9223	1.68016	10.2278	0.270448	3.6948	10.8347	10.7165	366.515
	Central_and_South_America		401.99	5.57336	2.60445	2.47297	1.31755	5.09633	4.3488	13.401	11.2538	448.059
		Brazil	55.9913	0.745657	1.85109	1.38267	0.490765	0.298692	2.5715	4.70865	5.45139	73.4917
	Eurasia		22.0042	3.95208	2.0587	1.6096	9.17519	6.77616	6.351	3.24933	12.9502	68.1264
		Russia	9.135	1.29142	1.75259	0.614387	6.79323	1.18236	5.93599	3.24933	11.3214	41.2757
	Europe		0	11.6532	4.8276	5.80636	17.2406	1.45583	11.186	72.6131	13.4465	138.229
		EU27	0	7.0006	3.60236	3.77945	11.6174	0.428591	7.4709	69.2548	8.49864	111.653
	Middle_East		0.2886	11.2928	0.456842	0.213752	1.0474	0.030533	4.38687	3.42278	24.8044	45.944
	North_America		3.28837	3.25056	2.43025	3.79415	9.41879	4.37329	6.21516	12.1962	19.0745	64.0413
		USA	0	2.03903	1.98184	3.10892	9.06088	0.794191	4.0602	1.4787	11.8729	34.3967
2030	Global		1130.62	167.627	111.872	54.0691	176.827	18.4394	89.6516	255.737	167.107	2171.95
	Africa		333.836	14.7659	2.23067	15.2119	3.37569	1.53014	2.52821	1.15793	9.1583	383.795
	Asia_Pacific		369.212	116.764	97.1894	26.4309	150.249	2.6329	57.6926	163.194	96.0485	1079.41
		China	44.2064	63.7819	43.7907	10.5828	81.1575	0.634803	33.6691	103.857	49.7952	431.475
		India	8.7216	29.2021	39.3057	11.1623	49.682	0	13.8004	11.796	26.6349	190.305
		Japan	0	1.75864	1.26163	0.216161	1.18651	0.0250411	2.81396	7.96455	4.39248	19.619
		Southeast_Asia	310.168	14.502	5.27392	1.5389	10.3884	0.24627	3.90864	8.48484	8.78809	363.299
	Central_and_South_America		401.99	6.09774	2.82864	2.75341	0.979164	3.71858	3.81112	13.3614	7.86496	443.405
		Brazil	55.9913	0.826757	1.98249	1.69172	0.43342	0.298692	2.26623	4.60826	3.52363	71.6225
	Eurasia		22.0042	3.65867	2.09128	1.1972	6.68482	5.90481	5.48849	2.83708	9.90913	59.7756
		Russia	9.135	1.24086	1.76916	0.449034	4.47876	1.18236	4.99622	2.83708	8.92868	35.0171
	Europe		0	12.2488	4.74772	4.45866	11.823	1.06614	9.83255	63.1239	13.0668	120.368
		EU27	0	7.22086	3.55489	3.05697	6.403	0.326829	6.05937	59.7399	8.46255	94.8243
	Middle_East		0.2886	10.6266	0.423806	0.205768	0.748786	0.0134873	4.4729	1.56186	15.0354	33.3771
	North_America		3.28837	3.46511	2.36072	3.81117	2.96634	3.57337	5.82572	10.501	16.0243	51.8161
		USA	0	2.18197	1.89104	3.0908	2.77999	0.794191	3.82683	1.50562	10.8139	26.8844
2035	Global		1130.62	170.877	116.17	48.7078	156.247	14.6206	88.7431	219.864	143.057	2088.91
	Africa		333.836	15.8521	2.56437	15.1142	2.67275	1.53014	2.89638	1.24667	7.41533	383.128
	Asia_Pacific		369.212	119.256	102.146	22.0535	137.996	2.18939	57.6079	144.435	87.0185	1041.92
		China	44.2064	63.785	41.0885	8.51764	72.1699	0.634803	30.3208	95.8013	40.408	396.932
		India	8.7216	30.7851	46.8077	9.27809	46.1951	0	16.6589	13.1702	28.0459	199.663
		Japan	0	1.81641	1.20292	0.200008	1.0395	0.0250411	2.73774	7.73974	4.40994	19.1713
		Southeast_Asia	310.168	14.9227	5.55425	1.42246	10.9852	0.222091	4.32881	5.84428	8.20618	361.654
	Central_and_South_America		401.99	6.4101	2.97443	2.83695	0.769548	2.40428	4.19023	11.8386	5.73739	439.152
		Brazil	55.9913	0.909285	2.08146	1.83637	0.419234	0.298692	2.40627	4.42228	2.30486	70.6697
	Eurasia		22.0042	3.34391	2.08008	0.968977	6.01651	5.03345	4.83348	2.46211	7.12352	53.8662
		Russia	9.135	1.17251	1.74937	0.336425	4.22407	1.18236	4.29038	2.46211	6.6454	31.1976
	Europe		0	12.5189	3.80966	3.74881	7.45585	0.676448	8.8942	50.013	12.1263	99.2431
		EU27	0	7.16919	2.73036	2.66963	1.94077	0.225068	5.14801	46.7484	8.02313	74.6546
	Middle_East		0.2886	9.86753	0.371151	0.194878	0.536078	0.0134873	4.51713	1.54084	9.65597	26.9857
	North_America		3.28837	3.62929	2.22396	3.79057	0.800274	2.77344	5.80375	8.32728	13.9796	44.6165
		USA	0	2.31899	1.75878	3.0999	0.638508	0.794191	3.69911	1.5549	9.97973	23.8441
2040	Global		1130.62	169.796	118.866	44.4005	134.547	9.67734	89.634	178.764	121.111	1997.42
	Africa		333.836	16.2119	2.76975	15.2128	1.92847	1.53014	3.23719	1.24427	5.21886	381.19
	Asia_Pacific		369.212	118.858	105.34	18.3109	120.88	1.72713	57.8928	123.299	85.0045	1000.52
		China	44.2064	63.7813	38.1177	7.17111	63.8059	0.634803	27.7498	87.689	38.7471	371.903
		India	8.7216	30.1915	53.29	7.18838	39.5593	0	19.2999	13.8867	29.3325	201.47
		Japan	0	1.84077	1.14565	0.186949	0.949087	0.0250411	2.66222	7.1967	4.33588	18.3423
		Southeast_Asia	310.168	14.9534	5.59104	1.26055	9.97777	0.197456	4.57857	1.7811	7.20975	355.717
	Central_and_South_America		401.99	6.47954	3.10226	2.99042	0.642925	0.887263	4.47932	7.58253	3.28986	431.444
		Brazil	55.9913	0.968078	2.16045	2.05352	0.375162	0.131941	2.53054	1.90144	0.723636	66.836
	Eurasia		22.0042	2.92151	1.99537	0.869762	3.57545	3.33715	4.50536	2.2003	4.26318	45.6723
		Russia	9.135	1.06856	1.66326	0.285016	2.14435	1.18236	3.93774	2.2003	4.06917	25.6858
	Europe		0	12.7823	3.24207	3.20022	6.65071	0.267979	8.58844	37.016	9.16107	80.9088
		EU27	0	7.25626	2.2165	2.43187	0.882776	0.117416	4.87419	33.8459	5.56817	57.1931
	Middle_East		0.2886	8.85909	0.320118	0.177794	0.359497	0.0134873	4.79626	1.50153	2.37538	18.6918
	North_America		3.28837	3.68431	2.09656	3.63856	0.50968	1.91419	6.13459	5.92064	11.7981	38.985
		USA	0	2.40845	1.63883	2.9803	0.361303	0.794191	3.93491	1.53514	9.14709	22.8002
2045	Global		1130.62	174.723	122.269	41.8344	123.074	9.67734	95.0922	191.736	126.609	2015.64
	Africa		333.836	17.414	3.12791	15.646	1.71548	1.53014	3.58337	1.52412	5.71378	384.091
	Asia_Pacific		369.212	121.683	108.475	15.909	109.547	1.72713	61.6454	132.489	88.4177	1009.11
		China	44.2064	63.7746	35.9343	6.6161	56.7122	0.634803	27.3703	91.9992	39.0301	366.278
		India	8.7216	32.0906	58.178	5.50576	34.7893	0	22.6779	16.971	31.3225	210.257
		Japan	0	1.82808	1.10756	0.181975	0.757385	0.0250411	2.67878	7.15736	4.24222	17.9784
		Southeast_Asia	310.168	15.3356	5.74293	1.1457	10.2786	0.197456	5.1309	2.28483	7.97728	358.261
	Central_and_South_America		401.99	6.90543	3.24926	2.92933	0.844988	0.887263	4.89822	8.76616	3.5825	434.053
		Brazil	55.9913	1.013	2.24741	2.07191	0.50803	0.131941	2.6955	2.17451	0.750613	67.5842
	Eurasia		22.0042	2.93358	1.99804	0.794679	3.6415	3.33715	4.68319	2.19269	4.24461	45.8296
		Russia	9.135	1.07959	1.65522	0.247733	2.13695	1.18236	4.04683	2.19269	4.04104	25.7174
	Europe		0	13.1647	3.0476	2.76217	6.46867	0.267979	8.74077	38.2245	9.36929	82.0457
		EU27	0	7.44296	2.00576	2.22947	0.752052	0.117416	4.83495	34.5733	5.70037	57.6563
	Middle_East		0.2886	8.83405	0.320721	0.183705	0.403089	0.0134873	5.15136	1.87658	2.5154	19.587
	North_America		3.28837	3.78822	2.04994	3.60946	0.45349	1.91419	6.38987	6.66268	12.7661	40.9223
		USA	0	2.44371	1.59214	2.92138	0.313063	0.794191	4.07091	1.70448	9.8559	23.6958
2050	Global		1130.62	178.016	123.452	39.9498	112.049	9.67734	99.6502	197.874	131.588	2022.88
	Africa		333.836	18.2286	3.51568	16.133	1.55207	1.53014	3.90154	1.83333	6.23274	386.764
	Asia_Pacific		369.212	123.736	109.333	14.0374	98.2389	1.72713	64.6264	135.375	91.6284	1007.91
		China	44.2064	63.7746	33.9681	6.39587	49.5976	0.634803	27.0262	91.0476	39.221	355.872
		India	8.7216	33.6204	60.6697	4.00249	30.5761	0	25.2922	19.1801	33.3212	215.384
		Japan	0	1.79112	1.06894	0.176792	0.549048	0.0250411	2.69692	7.14403	4.08066	17.5326
		Southeast_Asia	310.168	15.4549	5.85229	1.07725	10.0268	0.197456	5.64919	2.71587	8.68946	359.831
	Central_and_South_America		401.99	7.18404	3.37511	2.79364	1.00718	0.887263	5.28163	9.78653	3.88328	436.189
		Brazil	55.9913	1.03835	2.32207	2.0339	0.607994	0.131941	2.83868	2.3958	0.784676	68.1447
	Eurasia		22.0042	2.92797	1.99252	0.73426	3.7596	3.33715	4.81273	2.13517	4.19789	45.9015
		Russia	9.135	1.0741	1.64326	0.217954	2.1703	1.18236	4.11994	2.13517	3.98567	25.6638
	Europe		0	13.4258	2.94523	2.48723	6.60186	0.267979	8.87766	39.2802	9.49063	83.3766
		EU27	0	7.64288	1.88274	2.1804	0.708797	0.117416	4.80545	35.1407	5.77789	58.2563
	Middle_East		0.2886	8.68746	0.321177	0.187453	0.456217	0.0134873	5.46084	2.07835	2.61055	20.1041
	North_America		3.28837	3.82646	1.96956	3.57675	0.433613	1.91419	6.68939	7.38483	13.5448	42.628
		USA	0	2.44036	1.51201	2.85773	0.302603	0.794191	4.26713	1.89538	10.3865	24.4559

## Sheet: 04_BAS_HgMFR
04_BAS_HgMFR
YEAR	Region	Subregion	ASGM	CEM	COMB_IND	COMB_OTHER	COMB_POWER	GOLD	IND_PROC	NFME	OTHER	Grand Total
2050	Global			43.1498	35.6448	36.9132	30.8845	7.76511	48.3674	187.256	130.96	520.941
	Africa			4.42038	2.3141	15.2337	0.715694	1.53014	1.98807	1.83333	6.23274	34.2682
	Asia_Pacific			30.0056	26.1958	12.1868	24.3416	1.043	29.1109	124.76	91.3502	338.993
		China		15.4652	9.55226	4.75879	12.1851	0.634803	15.4592	91.0476	39.0355	188.138
		India		8.15285	11.8843	4.09972	7.6237	0	8.03786	8.56431	33.3215	81.6842
		Japan		0.434342	0.474621	0.157559	0.300987	0.0250411	1.10714	7.14403	4.08066	13.7244
		Southeast_Asia		3.74776	1.93419	1.03218	3.0226	0.0218186	2.59406	2.71587	8.65946	23.7279
	Central_and_South_America			1.74211	2.29586	2.7503	0.689196	0.887263	1.98761	9.78653	3.88328	24.0222
		Brazil		0.251797	1.78975	2.01935	0.425274	0.131941	1.05259	2.3958	0.784676	8.85117
	Eurasia			0.710023	0.935149	0.702808	1.2417	2.10905	2.5166	2.13517	3.93641	14.2869
		Russia		0.260466	0.823429	0.199628	0.837047	1.18236	2.09276	2.13517	3.72157	11.2524
	Europe			3.23711	2.1747	2.54747	2.91622	0.267979	4.43603	39.2786	9.40344	64.2615
		EU27		1.83478	1.58878	2.2559	0.521152	0.117416	2.71785	35.1391	5.77789	49.9528
	Middle_East			2.10668	0.176841	0.159125	0.738007	0.0134873	4.31766	2.07835	2.61055	12.2007
	North_America			0.927904	1.55229	3.33305	0.242092	1.91419	4.01058	7.38483	13.5431	32.908
		USA		0.59178	1.1053	2.68049	0.127164	0.794191	2.47651	1.89538	10.3907	20.0615

## Sheet: 05_CLIM1_CLE
05_CLIM1_CLE
YEAR	index	REGION_LABEL	ASGM	CEM	COMB_IND	COMB_OTHER	COMB_POWER	GOLD	IND_PROC	NFME	OTHER	Grand Total
2015	Global		952.611	153.747	85.3612	99.2733	263.518	43.5997	110.115	349.694	263.707	2321.63
	Africa		280.241	11.1812	1.93928	15.8621	8.9797	11.8008	2.88979	12.1153	13.9994	359.009
	Asia_Pacific		301.028	104.902	73.6357	69.9167	179.864	3.46155	53.4297	163.405	142.785	1092.43
		China	48.2694	61.8111	47.0406	47.9756	68.4913	0.693147	33.0987	85.6559	93.4905	486.526
		India	6.3687	21.9108	18.8193	14.8835	92.0443	0	9.82438	8.12	25.4571	197.428
		Japan	0	1.89372	0.691556	0.222872	2.04279	0.0305089	3.19277	7.61787	4.63402	20.3261
		Southeast_Asia	240.912	12.0788	2.99329	3.15612	6.37852	0.438159	3.01011	13.9961	11.1723	294.135
	Central_and_South_America		352.796	5.46003	2.25286	1.83634	2.35501	7.32063	7.31328	18.6041	12.9896	410.928
		Brazil	50.2677	0.807298	1.4614	0.648886	0.73635	0.268159	3.92149	6.19535	6.42066	70.7273
	Eurasia		14.3118	3.897	1.41784	1.84162	10.0892	14.5958	11.8961	55.5107	17.1731	130.733
		Russia	7.566	1.4265	0.852575	0.955998	8.67791	8.55404	10.0892	35.8089	15.1936	89.1247
	Europe		0	13.1392	2.46227	7.67487	35.334	1.31175	19.8931	81.896	20.1816	181.893
		EU27	0	6.97238	1.54284	4.8757	26.4302	0.420575	15.1708	78.2062	11.4019	145.021
	Middle_East		0.234	12.3913	0.690696	0.304081	1.43066	0.285019	6.27752	4.07426	27.4971	53.1847
	North_America		3.99938	2.77561	2.96251	1.83762	25.4652	4.82417	8.41532	14.0892	29.0816	93.4507
		USA	0	1.77814	2.40565	1.12714	24.2455	0.849785	5.52136	1.44257	20.084	57.4541
2020	Global		1130.62	160.894	105.619	73.4784	246.648	33.673	94.8457	295.895	232.056	2373.73
	Africa		333.836	12.1585	1.77782	14.6997	5.82868	8.59661	2.32761	6.53493	15.5718	401.332
	Asia_Pacific		369.212	112.441	91.9429	44.3836	194.674	3.51991	54.724	178.192	120.908	1170
		China	44.2064	63.7782	56.4131	25.6014	78.7454	0.634803	37.6508	104.494	70.1925	481.717
		India	8.7216	24.8322	22.7846	13.124	92.2457	0	7.23675	7.15492	26.6091	202.709
		Japan	0	1.78869	1.31071	0.255154	1.97406	0.0250411	2.48102	7.74087	4.29565	19.8712
		Southeast_Asia	310.168	13.6565	4.3749	1.95028	10.001	0.294627	3.60332	12.8652	11.8582	368.772
	Central_and_South_America		401.99	5.22464	2.32565	2.20329	1.85687	6.56619	4.85808	13.0226	13.8165	451.864
		Brazil	55.9913	0.688788	1.6853	1.13347	0.649882	0.298692	2.81771	4.75533	6.84483	74.8653
	Eurasia		22.0042	4.187	2.4028	1.86928	10.3534	7.94742	8.59172	6.3774	14.8449	78.5781
		Russia	9.135	1.28638	2.10448	0.712349	8.63122	1.40687	8.23467	6.3774	12.6226	50.5109
	Europe		0	11.9975	4.36428	6.89878	19.0906	1.83909	13.1635	75.5228	13.6366	146.513
		EU27	0	6.67372	3.03903	4.32543	12.2284	0.523911	8.7721	71.5111	7.93613	115.01
	Middle_East		0.2886	11.8175	0.450374	0.226058	1.29789	0.030533	4.77573	3.42573	31.6716	53.984
	North_America		3.28837	3.06761	2.35477	3.19761	13.5458	5.17321	6.4051	12.8194	21.6059	71.4578
		USA	0	1.89837	1.99983	2.57197	12.835	0.794191	4.16907	1.38882	12.9026	38.5599
2025	Global		1130.62	170.389	110.954	60.9789	218.337	29.0236	95.672	310.523	242.581	2369.08
	Africa		333.836	14.0186	1.86682	13.4538	4.81939	4.35673	2.49589	3.2672	17.727	395.842
	Asia_Pacific		369.212	118.481	96.7958	32.9749	176.349	3.51991	58.8018	187.919	120.479	1164.53
		China	44.2064	63.777	52.0083	16.5556	84.4854	0.634803	37.5732	109.97	64.9997	474.21
		India	8.7216	29.0519	30.6509	11.8933	69.3479	0	10.1644	9.42275	28.7191	197.972
		Japan	0	1.70067	1.35461	0.235121	1.67796	0.0250411	2.95517	8.17203	4.47704	20.5976
		Southeast_Asia	310.168	14.6417	4.87932	1.51471	10.3258	0.294627	4.18621	13.5491	13.6198	373.179
	Central_and_South_America		401.99	6.00496	2.62045	2.47417	1.24888	6.38117	4.44438	13.9351	15.1818	454.281
		Brazil	55.9913	0.757803	1.85378	1.46028	0.44472	0.298692	2.64766	4.70865	7.75567	75.9185
	Eurasia		22.0042	4.32971	2.09764	1.61468	9.84301	7.72291	7.42582	3.24933	16.0196	74.3069
		Russia	9.135	1.41482	1.79285	0.62043	7.37889	1.18236	7.02024	3.24933	13.9639	45.7578
	Europe		0	11.8285	4.53934	6.09711	16.2193	1.83909	11.8146	84.4683	13.7302	150.536
		EU27	0	7.02658	3.40154	3.82998	10.6967	0.523911	7.61285	80.809	7.83264	121.733
	Middle_East		0.2886	12.3719	0.485149	0.222987	1.08434	0.030533	4.48968	3.4372	36.5273	58.9377
	North_America		3.28837	3.35413	2.54918	4.1413	8.77329	5.17321	6.19979	14.2462	22.9169	70.6423
		USA	0	2.03903	2.09706	3.34769	8.43166	0.794191	3.97738	1.4787	13.3912	35.5569
2030	Global		1130.62	185.514	98.7346	44.9039	165.467	25.9947	93.3687	310.029	252.584	2307.22
	Africa		333.836	17.1887	2.04121	11.0704	3.3185	1.53014	2.69432	1.15793	20.1672	393.005
	Asia_Pacific		369.212	127.509	84.6077	19.8029	143.858	3.51991	58.2305	186.974	119.444	1113.16
		China	44.2064	63.7758	37.3006	8.61064	75.285	0.634803	34.0146	103.857	58.895	426.58
		India	8.7216	35.3725	33.1618	7.66869	48.1448	0	12.9581	11.796	31.1155	188.939
		Japan	0	1.75864	1.191	0.215313	1.21343	0.0250411	2.82429	7.96455	4.6087	19.801
		Southeast_Asia	310.168	15.8329	4.95083	1.15235	10.791	0.294627	4.65883	14.0929	15.4876	377.429
	Central_and_South_America		401.99	7.11759	2.76034	2.99224	0.702407	6.196	3.99518	14.4672	16.6694	456.891
		Brazil	55.9913	0.84706	1.92658	2.09846	0.322692	0.298692	2.3896	4.60826	8.77478	77.2574
	Eurasia		22.0042	4.43174	2.16969	1.19579	8.14633	7.72291	7.06606	2.83708	16.5093	72.0831
		Russia	9.135	1.50305	1.86339	0.471824	5.76919	1.18236	6.61877	2.83708	14.6202	44.0009
	Europe		0	12.688	4.12267	4.71133	6.76555	1.83909	10.7892	88.1742	13.6213	142.711
		EU27	0	7.35218	3.0493	3.00478	2.95931	0.523911	6.23872	84.1306	7.577	114.836
	Middle_East		0.2886	12.8719	0.475203	0.23366	0.889782	0.0134873	4.71378	1.56186	41.9667	63.015
	North_America		3.28837	3.70705	2.5578	4.89763	1.78569	5.17321	5.87976	14.8569	24.2057	66.3521
		USA	0	2.18197	2.08623	3.76835	1.57495	0.794191	3.78415	1.50562	13.9037	29.5992
2035	Global		1130.62	200.087	90.8472	37.2201	136.787	25.9929	94.0441	303.404	262.621	2281.62
	Africa		333.836	20.2112	2.18387	9.91939	2.37153	1.53014	3.2238	1.24667	22.4509	396.974
	Asia_Pacific		369.212	136.509	77.3814	14.2337	121.525	3.51991	59.1559	180.11	117.993	1079.64
		China	44.2064	63.7758	29.5478	6.26641	61.4307	0.634803	31.1813	95.8013	52.1615	385.006
		India	8.7216	41.6949	34.1549	4.81664	41.9932	0	16.131	13.1702	33.7284	194.411
		Japan	0	1.81641	1.05327	0.18674	0.800291	0.0250411	2.70443	7.73974	4.67693	19.0029
		Southeast_Asia	310.168	17.0581	4.98494	1.1464	9.77637	0.294627	5.35205	14.4779	17.4194	380.678
	Central_and_South_America		401.99	8.17352	2.78446	3.00229	0.674283	6.19412	4.43465	14.9838	18.2013	460.439
		Brazil	55.9913	0.943195	1.95241	2.25814	0.333001	0.298692	2.58354	4.42228	9.81558	78.5981
	Eurasia		22.0042	4.52895	2.24374	0.928475	7.14079	7.72291	6.83528	2.46211	16.9816	70.848
		Russia	9.135	1.58803	1.94089	0.427405	5.359	1.18236	6.34857	2.46211	15.257	43.7004
	Europe		0	13.2588	3.21895	3.62085	3.78483	1.83909	9.88107	88.2191	13.537	137.36
		EU27	0	7.42248	2.27702	2.46932	0.493942	0.523911	5.12273	83.9285	7.33611	109.574
	Middle_East		0.2886	13.3645	0.468001	0.234774	0.824867	0.0134873	4.73147	1.54084	47.7754	69.2419
	North_America		3.28837	4.04119	2.56682	5.28063	0.465508	5.17321	5.78198	14.842	25.6823	67.122
		USA	0	2.31899	2.09847	3.84232	0.291952	0.794191	3.55573	1.5549	14.599	29.0556
2040	Global		1130.62	211.201	82.8	30.3138	92.2166	25.8445	96.302	295.812	279.415	2244.53
	Africa		333.836	22.5242	2.29575	8.76264	1.68259	1.53014	3.74944	1.24427	24.9259	400.551
	Asia_Pacific		369.212	143.126	69.6531	9.25741	78.7262	3.51991	59.7912	173.519	124.255	1031.06
		China	44.2064	63.7758	23.115	4.66917	41.8302	0.634803	28.7734	87.689	53.1872	347.881
		India	8.7216	46.3685	33.4413	1.70126	21.2289	0	18.8202	13.8867	36.4248	180.593
		Japan	0	1.84077	0.898118	0.170138	0.6057	0.0250411	2.48448	7.1967	4.65356	17.8745
		Southeast_Asia	310.168	17.7559	4.90168	1.05773	8.0214	0.294627	5.88286	14.182	19.2918	381.556
	Central_and_South_America		401.99	9.31576	2.80683	3.00607	0.727986	6.04575	4.78479	12.2914	19.9336	460.902
		Brazil	55.9913	1.01682	1.98746	2.37719	0.377753	0.298692	2.77984	4.25833	10.824	79.9114
	Eurasia		22.0042	4.4869	2.2354	0.790743	6.29447	7.72291	7.05878	2.2003	17.5115	70.3052
		Russia	9.135	1.64111	1.94115	0.403684	4.91478	1.18236	6.53757	2.2003	15.7039	43.6599
	Europe		0	13.8573	2.77138	2.69766	3.45603	1.83909	9.7544	90.4563	12.0374	136.87
		EU27	0	7.65888	1.92464	2.15449	0.606196	0.523911	4.71372	85.8206	5.58277	108.985
	Middle_East		0.2886	13.6059	0.475221	0.227525	0.84457	0.0134873	5.06636	1.50153	53.4561	75.4794
	North_America		3.28837	4.28497	2.56229	5.57173	0.484809	5.17321	6.09708	14.5992	27.2948	69.3565
		USA	0	2.40845	2.09811	3.85925	0.327866	0.794191	3.75833	1.53514	15.4113	30.1926
2045	Global		1130.62	218.505	73.4676	27.7133	65.7622	25.8445	99.2997	320.332	296.074	2257.62
	Africa		333.836	24.3145	2.39595	8.39056	1.31392	1.53014	4.12252	1.52412	27.2842	404.712
	Asia_Pacific		369.212	147.496	60.465	8.22122	53.5288	3.51991	61.4598	191.494	130.514	1025.91
		China	44.2064	63.7758	17.7625	4.15442	27.4944	0.634803	27.3627	91.9992	53.9988	331.389
		India	8.7216	49.2852	30.519	1.1348	12.0396	0	21.4504	16.971	39.247	179.369
		Japan	0	1.82808	0.777014	0.182275	0.462666	0.0250411	2.39003	7.15736	4.54698	17.3694
		Southeast_Asia	310.168	18.1979	4.60532	1.03465	6.36871	0.294627	6.41242	18.2291	21.3473	386.658
	Central_and_South_America		401.99	9.93721	2.78099	2.71416	0.888983	6.04575	4.99289	14.1783	21.8466	465.375
		Brazil	55.9913	1.06401	1.99261	2.14383	0.472471	0.298692	2.9059	4.86989	11.9495	81.6882
	Eurasia		22.0042	4.50544	2.20133	0.726659	5.90197	7.72291	7.27506	2.19269	18.0886	70.6189
		Russia	9.135	1.65805	1.9191	0.390852	4.66069	1.18236	6.72282	2.19269	16.1965	44.058
	Europe		0	14.26	2.59345	2.33095	2.82247	1.83909	9.62896	92.897	12.3956	138.768
		EU27	0	7.85239	1.79655	1.90652	0.591353	0.523911	4.4094	87.6162	5.70715	110.404
	Middle_East		0.2886	13.5675	0.475684	0.239637	0.820225	0.0134873	5.43383	1.87658	56.9305	79.646
	North_America		3.28837	4.42395	2.55515	5.09016	0.485865	5.17321	6.3866	16.1695	29.0141	72.5869
		USA	0	2.44371	2.09649	3.46578	0.334936	0.794191	3.96405	1.70448	16.2479	31.0515
2050	Global		1130.62	223.561	64.1909	27.2456	46.4822	25.8445	100.944	337.232	313.936	2270.06
	Africa		333.836	25.5508	2.52037	8.07748	1.21919	1.53014	4.45422	1.83333	29.4992	408.521
	Asia_Pacific		369.212	150.809	51.2461	8.49263	34.4974	3.51991	62.3495	202.593	137.144	1019.86
		China	44.2064	63.7758	13.4641	4.31271	14.7639	0.634803	26.0504	91.0476	54.9486	313.204
		India	8.7216	51.6347	26.5233	1.16373	6.81483	0	23.1755	19.1801	42.1828	179.397
		Japan	0	1.79112	0.704878	0.206599	0.333215	0.0250411	2.34989	7.14403	4.37946	16.9342
		Southeast_Asia	310.168	18.3269	4.31538	1.00293	5.24571	0.294627	6.91039	21.8327	23.5056	391.602
	Central_and_South_America		401.99	10.3457	2.77751	2.64773	1.1124	6.04575	5.14465	15.7773	23.9575	469.799
		Brazil	55.9913	1.09063	2.00246	2.09816	0.620681	0.298692	3.0221	5.36547	13.2069	83.6963
	Eurasia		22.0042	4.49681	2.16599	0.688121	5.83826	7.72291	7.44404	2.13517	18.696	71.1915
		Russia	9.135	1.64962	1.89188	0.383075	4.65652	1.18236	6.86017	2.13517	16.712	44.6058
	Europe		0	14.5318	2.46369	2.10894	2.47044	1.83909	9.25163	95.1111	12.677	140.454
		EU27	0	8.06115	1.72845	1.7328	0.585537	0.523911	4.03931	89.1885	5.79614	111.656
	Middle_East		0.2886	13.3423	0.469282	0.250242	0.849013	0.0134873	5.7473	2.07835	61.248	84.2866
	North_America		3.28837	4.48415	2.548	4.9805	0.4955	5.17321	6.55254	17.7039	30.7142	75.9404
		USA	0	2.44036	2.09398	3.4638	0.340016	0.794191	4.07748	1.89538	17.013	32.1182

## Sheet: 06_CLIM2_CLE
06_CLIM2_CLE
YEAR	index	REGION_LABEL	ASGM	CEM	COMB_IND	COMB_OTHER	COMB_POWER	GOLD	IND_PROC	NFME	OTHER	Grand Total
2015	Global		941.399	153.747	85.3612	99.2733	263.518	43.5997	110.115	349.694	263.707	2310.41
	Africa		280.241	11.1812	1.93928	15.8621	8.9797	11.8008	2.88979	12.1153	13.9994	359.009
	Asia_Pacific		289.816	104.902	73.6357	69.9167	179.864	3.46155	53.4297	163.405	142.785	1081.22
		China	48.2694	61.8111	47.0406	47.9756	68.4913	0.693147	33.0987	85.6559	93.4905	486.526
		India	6.3687	21.9108	18.8193	14.8835	92.0443	0	9.82438	8.12	25.4571	197.428
		Japan	0	1.89372	0.691556	0.222872	2.04279	0.0305089	3.19277	7.61787	4.63402	20.3261
		Southeast_Asia	229.699	12.0788	2.99329	3.15612	6.37852	0.438159	3.01011	13.9961	11.1723	282.922
	Central_and_South_America		352.796	5.46003	2.25286	1.83634	2.35501	7.32063	7.31328	18.6041	12.9896	410.928
		Brazil	50.2677	0.807298	1.4614	0.648886	0.73635	0.268159	3.92149	6.19535	6.42066	70.7273
	Eurasia		14.3118	3.897	1.41784	1.84162	10.0892	14.5958	11.8961	55.5107	17.1731	130.733
		Russia	7.566	1.4265	0.852575	0.955998	8.67791	8.55404	10.0892	35.8089	15.1936	89.1247
	Europe		0	13.1392	2.46227	7.67487	35.334	1.31175	19.8929	81.896	20.1816	181.893
		EU27	0	6.97238	1.54284	4.8757	26.4302	0.420575	15.1706	78.2062	11.4019	145.02
	Middle_East		0.234	12.3913	0.690696	0.304081	1.43066	0.285019	6.27752	4.07426	27.4971	53.1847
	North_America		3.99938	2.77561	2.96251	1.83762	25.4652	4.82417	8.41532	14.0892	29.0816	93.4507
		USA	0	1.77814	2.40565	1.12714	24.2455	0.849785	5.52136	1.44257	20.084	57.4541
2020	Global		1130.62	160.894	105.619	73.4784	246.648	33.673	94.8456	295.895	232.056	2373.73
	Africa		333.836	12.1585	1.77782	14.6997	5.82868	8.59661	2.32761	6.53493	15.5718	401.332
	Asia_Pacific		369.212	112.441	91.9429	44.3836	194.674	3.51991	54.724	178.192	120.908	1170
		China	44.2064	63.7782	56.4131	25.6014	78.7454	0.634803	37.6508	104.494	70.1925	481.717
		India	8.7216	24.8322	22.7846	13.124	92.2457	0	7.23675	7.15492	26.6091	202.709
		Japan	0	1.78869	1.31071	0.255154	1.97406	0.0250411	2.48102	7.74087	4.29565	19.8712
		Southeast_Asia	310.168	13.6565	4.3749	1.95028	10.001	0.294627	3.60332	12.8652	11.8582	368.772
	Central_and_South_America		401.99	5.22464	2.32565	2.20329	1.85687	6.56619	4.85808	13.0226	13.8165	451.864
		Brazil	55.9913	0.688788	1.6853	1.13347	0.649882	0.298692	2.81771	4.75533	6.84483	74.8653
	Eurasia		22.0042	4.187	2.4028	1.86928	10.3534	7.94742	8.59172	6.3774	14.8449	78.5781
		Russia	9.135	1.28638	2.10448	0.712349	8.63122	1.40687	8.23467	6.3774	12.6226	50.5109
	Europe		0	11.9975	4.36428	6.89878	19.0906	1.83909	13.1634	75.5228	13.6366	146.513
		EU27	0	6.67372	3.03903	4.32543	12.2284	0.523911	8.77198	71.5111	7.93613	115.01
	Middle_East		0.2886	11.8175	0.450374	0.226058	1.29789	0.030533	4.77573	3.42573	31.6716	53.984
	North_America		3.28837	3.06761	2.35477	3.19761	13.5458	5.17321	6.4051	12.8194	21.6059	71.4578
		USA	0	1.89837	1.99983	2.57197	12.835	0.794191	4.16907	1.38882	12.9026	38.5599
2025	Global		1130.62	170.389	102.33	57.4312	195.475	29.0236	93.4837	310.523	241.675	2330.95
	Africa		333.836	14.0186	1.77394	12.241	4.06977	4.35673	2.50279	3.2672	17.7216	393.788
	Asia_Pacific		369.212	118.481	88.7441	31.0315	157.425	3.51991	57.414	187.919	120.096	1133.84
		China	44.2064	63.777	46.4064	15.6966	79.6861	0.634803	36.5201	109.97	64.6743	461.572
		India	8.7216	29.0519	29.1686	10.8801	57.0534	0	10.0107	9.42275	28.6947	183.004
		Japan	0	1.70067	1.30254	0.2542	1.54647	0.0250411	2.89822	8.17203	4.4633	20.3625
		Southeast_Asia	310.168	14.6417	4.62225	1.34721	8.21184	0.294627	4.18989	13.5491	13.6187	370.643
	Central_and_South_America		401.99	6.00496	2.60387	2.28696	1.17531	6.38117	4.39231	13.9351	15.1597	453.93
		Brazil	55.9913	0.757803	1.85152	1.38888	0.448263	0.298692	2.6251	4.70865	7.74456	75.8147
	Eurasia		22.0042	4.32971	1.87823	1.74902	8.26544	7.72291	6.98245	3.24933	15.8441	72.0254
		Russia	9.135	1.41482	1.59495	0.799455	6.34537	1.18236	6.58068	3.24933	13.7913	44.0932
	Europe		0	11.8285	4.28827	5.3061	15.0363	1.83909	11.5771	84.4683	13.5854	147.929
		EU27	0	7.02658	3.19018	3.54475	10.436	0.523911	7.38607	80.809	7.70745	120.624
	Middle_East		0.2886	12.3719	0.511314	0.26945	0.761622	0.030533	4.43457	3.4372	36.4808	58.586
	North_America		3.28837	3.35413	2.53041	4.54724	8.74144	5.17321	6.18057	14.2462	22.7876	70.8492
		USA	0	2.03903	2.05122	3.74644	8.388	0.794191	3.9636	1.4787	13.2764	35.7376
2030	Global		1130.62	185.514	85.1438	34.4386	87.4392	25.9947	90.0883	310.029	250.775	2200.04
	Africa		333.836	17.1887	1.7377	6.26962	0.867752	1.53014	2.72266	1.15793	20.0944	385.405
	Asia_Pacific		369.212	127.509	72.1299	15.3282	79.8187	3.51991	56.4733	186.974	118.811	1029.78
		China	44.2064	63.7758	31.0339	7.02139	52.1639	0.634803	32.8445	103.857	58.2832	393.821
		India	8.7216	35.3725	29.7226	5.75173	17.2285	0	12.7516	11.796	31.0153	152.36
		Japan	0	1.75864	1.06985	0.247907	0.902926	0.0250411	2.66106	7.96455	4.56938	19.1994
		Southeast_Asia	310.168	15.8329	4.24751	0.6561	3.73681	0.294627	4.66047	14.0929	15.6185	369.308
	Central_and_South_America		401.99	7.11759	2.69997	2.04075	0.471643	6.196	3.86664	14.4672	16.574	455.424
		Brazil	55.9913	0.84706	1.90928	1.49526	0.257322	0.298692	2.3714	4.60826	8.73744	76.516
	Eurasia		22.0042	4.43174	1.75129	1.47846	2.5612	7.72291	6.25954	2.83708	16.2619	65.3083
		Russia	9.135	1.50305	1.49551	0.869583	1.50659	1.18236	5.81516	2.83708	14.3914	38.7358
	Europe		0	12.688	3.70384	3.38133	2.2105	1.83909	10.4347	88.1742	13.3574	135.789
		EU27	0	7.35218	2.74533	2.53344	0.71453	0.523911	5.97329	84.1306	7.38179	111.355
	Middle_East		0.2886	12.8719	0.632102	0.379061	0.317554	0.0134873	4.5668	1.56186	41.8426	62.4739
	North_America		3.28837	3.70705	2.489	5.56117	1.19187	5.17321	5.76455	14.8569	23.8333	65.8654
		USA	0	2.18197	1.95228	4.49895	1.08068	0.794191	3.73375	1.50562	13.5715	29.319
2035	Global		1130.62	200.087	71.5091	28.4033	40.7075	25.9929	88.7788	303.404	260.254	2149.76
	Africa		333.836	20.2112	1.69281	5.08641	0.419259	1.53014	3.28681	1.24667	22.2382	389.548
	Asia_Pacific		369.212	136.509	59.3712	10.8895	36.6912	3.51991	55.9377	180.11	117.465	969.706
		China	44.2064	63.7758	22.276	5.03501	26.8141	0.634803	29.5932	95.8013	51.4373	339.574
		India	8.7216	41.6949	27.6673	3.43019	3.83783	0	15.0476	13.1702	33.543	147.113
		Japan	0	1.81641	0.908823	0.247621	0.269901	0.0250411	2.53301	7.73974	4.62485	18.1654
		Southeast_Asia	310.168	17.0581	3.91774	0.619328	2.17514	0.294627	5.30347	14.4779	17.6183	371.633
	Central_and_South_America		401.99	8.17352	2.7125	1.99114	0.523335	6.19412	4.19074	14.9838	18.0531	458.813
		Brazil	55.9913	0.943195	1.94596	1.50342	0.264946	0.298692	2.54681	4.42228	9.76097	77.6775
	Eurasia		22.0042	4.52895	1.65084	1.31689	0.962321	7.72291	5.64478	2.46211	16.7773	63.0702
		Russia	9.135	1.58803	1.42964	0.848207	0.411062	1.18236	5.16423	2.46211	15.0909	37.3115
	Europe		0	13.2588	2.84114	2.71441	1.4004	1.83909	9.5796	88.2191	13.0253	132.878
		EU27	0	7.42248	2.04681	2.10364	0.447935	0.523911	4.90852	83.9285	6.95335	108.335
	Middle_East		0.2886	13.3645	0.830498	0.436646	0.126949	0.0134873	4.55139	1.54084	47.5428	68.6957
	North_America		3.28837	4.04119	2.41013	5.96827	0.584021	5.17321	5.58781	14.842	25.152	67.047
		USA	0	2.31899	1.85795	4.81475	0.451833	0.794191	3.51331	1.5549	14.1317	29.4376
2040	Global		1130.62	211.201	57.6847	21.4385	6.94285	25.8445	88.4225	295.812	274.867	2112.83
	Africa		333.836	22.5242	1.58929	3.67521	0.343197	1.53014	3.79339	1.24427	24.5017	393.038
	Asia_Pacific		369.212	143.126	46.1666	6.8468	4.34349	3.51991	54.7841	173.519	122.991	924.509
		China	44.2064	63.7758	16.1541	3.38949	1.49781	0.634803	26.7382	87.689	52.4043	296.49
		India	8.7216	46.3685	22.2723	1.26232	0.805478	0	16.4718	13.8867	36.1236	145.912
		Japan	0	1.84077	0.744136	0.223255	0.267186	0.0250411	2.35259	7.1967	4.6012	17.2509
		Southeast_Asia	310.168	17.7559	3.48611	0.460944	1.51671	0.294627	5.7805	14.182	19.4927	373.137
	Central_and_South_America		401.99	9.31576	2.67394	1.71609	0.620605	6.04575	4.36779	12.2914	19.7487	458.77
		Brazil	55.9913	1.01682	1.94854	1.29466	0.269152	0.298692	2.67162	4.25833	10.7552	78.5043
	Eurasia		22.0042	4.4869	1.51224	1.15396	0.183037	7.72291	5.49449	2.2003	16.424	61.182
		Russia	9.135	1.64111	1.33134	0.782599	0.178104	1.18236	4.98553	2.2003	14.6728	36.1092
	Europe		0	13.8573	2.3893	2.35478	0.743869	1.83909	9.32616	90.4563	11.3614	132.328
		EU27	0	7.65888	1.71732	1.86992	0.467782	0.523911	4.41287	85.8206	5.39395	107.865
	Middle_East		0.2886	13.6059	1.12128	0.500827	0.150019	0.0134873	4.89719	1.50153	53.1298	75.2086
	North_America		3.28837	4.28497	2.232	5.19078	0.558632	5.17321	5.75938	14.5992	26.7109	67.7975
		USA	0	2.40845	1.70095	4.09648	0.405698	0.794191	3.68657	1.53514	14.9016	29.5291
2045	Global		1130.62	218.505	45.8415	19.5443	7.2028	25.8445	89.6601	320.332	289.421	2146.97
	Africa		333.836	24.3145	1.46826	3.40896	0.40254	1.53014	4.13598	1.52412	26.6763	397.297
	Asia_Pacific		369.212	147.496	34.6861	6.61625	4.32941	3.51991	55.5793	191.494	128.202	941.136
		China	44.2064	63.7758	12.001	3.12814	1.11464	0.634803	24.9763	91.9992	52.1799	294.016
		India	8.7216	49.2852	16.4513	1.26375	0.878848	0	18.7166	16.971	38.8981	151.186
		Japan	0	1.82808	0.606887	0.175462	0.274756	0.0250411	2.26848	7.15736	4.49958	16.8356
		Southeast_Asia	310.168	18.1979	2.94738	0.397344	1.73631	0.294627	6.16646	18.2291	21.5592	379.696
	Central_and_South_America		401.99	9.93721	2.60152	1.59697	0.771569	6.04575	4.49133	14.1783	21.6329	463.246
		Brazil	55.9913	1.06401	1.91149	1.21675	0.279527	0.298692	2.72102	4.86989	11.8628	80.2154
	Eurasia		22.0042	4.50544	1.41825	1.03459	0.182619	7.72291	5.27002	2.19269	16.2676	60.5983
		Russia	9.135	1.65805	1.26097	0.677388	0.177678	1.18236	4.81116	2.19269	14.4503	35.5456
	Europe		0	14.26	2.19661	1.99431	0.77218	1.83909	8.99687	92.897	11.7304	134.687
		EU27	0	7.85239	1.6183	1.54453	0.466119	0.523911	4.1029	87.6162	5.5028	109.227
	Middle_East		0.2886	13.5675	1.44838	0.4582	0.171669	0.0134873	5.27163	1.87658	56.5268	79.6228
	North_America		3.28837	4.42395	2.02233	4.43497	0.572815	5.17321	5.91501	16.1695	28.3853	70.3854
		USA	0	2.44371	1.52198	3.39472	0.41201	0.794191	3.84368	1.70448	15.7013	29.8161
2050	Global		1130.62	223.561	37.2683	16.8938	7.76149	25.8445	90.8713	337.232	307.071	2177.12
	Africa		333.836	25.5508	1.32462	2.79658	0.472923	1.53014	4.30878	1.83333	28.8282	400.482
	Asia_Pacific		369.212	150.809	26.1871	5.82702	4.56877	3.51991	56.138	202.593	134.669	953.524
		China	44.2064	63.7758	8.84157	2.51903	1.14541	0.634803	23.7208	91.0476	53.0455	288.937
		India	8.7216	51.6347	12.0964	1.25637	0.897627	0	20.1316	19.1801	41.805	155.723
		Japan	0	1.79112	0.548629	0.113392	0.283553	0.0250411	2.28075	7.14403	4.33913	16.5257
		Southeast_Asia	310.168	18.3269	2.59766	0.332709	1.84118	0.294627	6.52446	21.8327	23.6816	385.6
	Central_and_South_America		401.99	10.3457	2.58556	1.40374	0.942224	6.04575	4.63823	15.7773	23.7301	467.459
		Brazil	55.9913	1.09063	1.8965	1.07978	0.308498	0.298692	2.80799	5.36547	13.1082	81.947
	Eurasia		22.0042	4.49681	1.35316	0.871043	0.182598	7.72291	5.12286	2.13517	16.9953	60.884
		Russia	9.135	1.64962	1.21288	0.580387	0.177657	1.18236	4.72585	2.13517	15.1029	35.9019
	Europe		0	14.5318	2.12015	1.81249	0.821289	1.83909	8.98919	95.1111	12.074	137.299
		EU27	0	8.06115	1.56145	1.3726	0.500336	0.523911	4.01507	89.1885	5.58107	110.804
	Middle_East		0.2886	13.3423	1.73491	0.399344	0.193399	0.0134873	5.5849	2.07835	60.7731	84.4084
	North_America		3.28837	4.48415	1.96277	3.78358	0.58028	5.17321	6.08932	17.7039	30.0011	73.0667
		USA	0	2.44036	1.47335	2.85887	0.41557	0.794191	4.04846	1.89538	16.4009	30.327

## Sheet: 07_CLIM2_HgMFR
07_CLIM2_HgMFR
YEAR	Region	Subregion	ASGM	CEM	COMB_IND	COMB_OTHER	COMB_POWER	GOLD	IND_PROC	NFME	OTHER	Grand Total
2050	Global			43.1498	25.253	15.7374	5.54421	7.76511	41.4975	187.256	120.451	446.654
	Africa			4.42038	1.07394	2.53895	0.353741	1.53014	1.94445	1.83333	5.67482	19.3698
	Asia_Pacific			30.0056	16.0529	5.55173	3.04181	1.043	22.7657	124.76	86.0303	289.251
		China		15.4652	6.74725	2.10754	0.460112	0.634803	9.46141	91.0476	36.1473	162.071
		India		8.15285	5.77103	1.67098	0.684577	0	7.38958	8.56431	31.7682	64.0015
		Japan		0.434342	0.360404	0.101668	0.252355	0.0250411	1.15288	7.14403	3.95505	13.4258
		Southeast_Asia		3.74776	1.80196	0.268848	1.35886	0.0218186	3.05939	2.71587	8.16605	21.1406
	Central_and_South_America			1.74211	2.15526	1.47076	0.733303	0.887263	1.90336	9.78653	3.44933	22.1279
		Brazil		0.251797	1.56758	1.18261	0.243396	0.131941	1.07184	2.3958	0.619089	7.46405
	Eurasia			0.710023	0.778611	0.730917	0.148188	2.10905	2.71218	2.13517	3.12218	12.4463
		Russia		0.260466	0.688436	0.481481	0.144058	1.18236	2.5773	2.13517	2.99286	10.4621
	Europe			3.23711	1.89296	1.65862	0.639265	0.267979	4.12449	39.2786	8.57209	59.6711
		EU27		1.83478	1.45267	1.27644	0.409412	0.117416	2.43316	35.1391	5.31762	47.9806
	Middle_East			2.10668	1.43127	0.340845	0.124109	0.0134873	4.34959	2.07835	1.74467	12.189
	North_America			0.927904	1.86804	3.44559	0.503791	1.91419	3.69773	7.38483	11.8575	31.5995
		USA		0.59178	1.40559	2.60414	0.361175	0.794191	2.19505	1.89538	8.95152	18.7988
